# Supplementary material for: Salt Tolerance Potential in Onion: Confirmation through Physiological and Biochemical Traits
Source: MDPI journal article supplement (doi:10.3390/plants11233325), 2022-12-01
Supplement: s1 [file s1]

## Supplementary Tables

**Table S1:**Bulb yield and yield related observations of 36 onion accessions under control and salinity stress condition

| Cultivar name*               | Control             |                           |                          |                            |                            | Salinity (ECiw7 dSm <sup>-1</sup> ) |                           |                          |                            |                            |
|------------------------------|---------------------|---------------------------|--------------------------|----------------------------|----------------------------|-------------------------------------|---------------------------|--------------------------|----------------------------|----------------------------|
|                              | Plant height<br>cm) | Number of<br>leaves/plant | Bulb<br>diameter<br>(cm) | Bulb<br>yield/plant<br>(g) | Total<br>soluble<br>solids | Plant height<br>cm)                 | Number of<br>leaves/plant | Bulb<br>diameter<br>(cm) | Bulb<br>yield/plant<br>(g) | Total<br>soluble<br>solids |
| Pusa Red                     | 43.17±1.25          | 8.45±0.03                 | 5.64±0.09                | 52.29±0.45                 | 13.90±0.06                 | 41.18±0.28                          | 8.10±0.06                 | 5.21±0.05                | 36.83±0.07                 | 13.20±0.12                 |
| Kalyanpur Red Round<br>(KKR) | 42.25±0.42          | 7.90±0.05                 | 5.06±0.02                | 40.00±0.14                 | 15.77±0.06                 | 37.46±0.32                          | 7.84±0.09                 | 4.21±0.05                | 22.60±0.35                 | 14.85±0.04                 |
| ALR                          | 44.88±0.68          | 8.76±0.06                 | 4.70±0.06                | 41.53±0.06                 | 12.90±0.06                 | 41.45±0.40                          | 8.56±0.12                 | 4.17±0.07                | 23.89±0.06                 | 12.20±0.12                 |
| B-780 (Baswant780)           | 38.95±0.13          | 8.39±0.27                 | 5.75±0.03                | 71.05±0.03                 | 11.83±0.04                 | 35.37±0.25                          | 8.02±0.05                 | 4.75±0.03                | 46.40±0.23                 | 10.67±0.06                 |
| Agrifound White              | 40.66±0.36          | 8.25±0.03                 | 5.10±0.03                | 50.22±0.13                 | 13.60±0.17                 | 35.49±0.61                          | 8.10±0.05                 | 4.86±0.03                | 28.18±0.10                 | 11.97±0.02                 |
| Punjab Naroya                | 41.48±0.20          | 7.30±0.12                 | 5.23±0.07                | 48.42±0.45                 | 13.63±0.06                 | 38.73±0.19                          | 7.08±0.05                 | 4.75±0.03                | 32.78±0.13                 | 13.90±0.06                 |
| GJWO-1                       | 43.82±0.25          | 8.17±0.14                 | 5.31±0.02                | 58.70±0.17                 | 12.37±0.06                 | 42.62±0.47                          | 7.96±0.03                 | 4.94±0.03                | 49.10±0.06                 | 10.37±0.04                 |
| RO 59 (Arpita)               | 44.85±0.41          | 7.78±0.13                 | 5.76±0.02                | 46.42±0.24                 | 11.87±0.02                 | 42.73±0.53                          | 7.60±0.13                 | 5.36±0.02                | 32.50±0.29                 | 10.60±0.12                 |
| Arka Pitamber                | 47.33±0.32          | 9.10±0.04                 | 4.90±0.05                | 36.89±0.06                 | 15.67±0.06                 | 43.88±0.42                          | 8.76±0.08                 | 4.15±0.03                | 26.00±0.14                 | 15.27±0.16                 |
| NHRDF Red (L-28)             | 43.95±0.37          | 9.01±0.06                 | 5.80±0.05                | 77.00±0.12                 | 12.07±0.04                 | 43.48±0.42                          | 8.98±0.05                 | 5.44±0.06                | 65.35±0.20                 | 10.67±0.08                 |
| Bhima Super                  | 42.84±0.47          | 8.44±0.03                 | 5.22±0.05                | 56.28±0.16                 | 12.30±0.17                 | 38.60±0.53                          | 7.89±0.08                 | 4.84±0.03                | 36.44±0.25                 | 12.07±0.01                 |
| Bhima Raj                    | 39.89±0.24          | 8.32±0.05                 | 5.29±0.06                | 66.31±0.18                 | 12.80±0.12                 | 38.83±0.23                          | 8.25±0.08                 | 4.78±0.03                | 43.37±0.21                 | 11.63±0.06                 |
| Bhima Red                    | 38.87±0.39          | 7.90±0.09                 | 5.21±0.05                | 51.15±0.09                 | 12.43±0.06                 | 36.52±0.43                          | 7.66±0.12                 | 4.73±0.02                | 40.82±0.06                 | 12.00±0.12                 |
| BhimaShweta                  | 33.44±0.65          | 8.30±0.06                 | 5.33±0.05                | 53.84±0.06                 | 11.87±0.08                 | 32.50±0.17                          | 8.05±0.03                 | 5.09±0.05                | 40.53±0.12                 | 11.70±0.17                 |
| Bhima Shakti                 | 32.33±0.16          | 8.70±0.14                 | 5.44±0.05                | 55.17±0.10                 | 12.70±0.06                 | 30.45±0.51                          | 8.33±0.10                 | 4.99±0.08                | 35.88±0.07                 | 12.07±0.04                 |
| POS38                        | 38.75±0.18          | 9.06±0.06                 | 5.28±0.08                | 69.67±0.06                 | 12.10±0.06                 | 37.65±0.45                          | 8.91±0.05                 | 4.87±0.04                | 55.90±0.06                 | 11.50±0.12                 |
| Arka Bheem                   | 45.40±0.40          | 8.21±0.33                 | 5.19±0.03                | 54.84±0.09                 | 14.37±0.12                 | 41.82±0.16                          | 7.24±0.14                 | 4.72±0.05                | 33.11±0.06                 | 11.80±0.12                 |
| RO-252                       | 43.93±0.53          | 8.35±0.09                 | 5.91±0.03                | 56.75±0.14                 | 12.37±0.14                 | 41.57±0.14                          | 8.20±0.07                 | 5.31±0.10                | 35.69±0.06                 | 11.83±0.04                 |
| Bhima Dark Red               | 45.26±0.43          | 8.74±0.08                 | 5.09±0.05                | 72.10±0.06                 | 12.17±0.10                 | 42.08±0.20                          | 8.29±0.04                 | 4.06±0.05                | 26.78±0.05                 | 11.10±0.06                 |
| NHRDF Red-3 (L-652)          | 42.37±0.38          | 8.45±0.09                 | 5.26±0.06                | 55.10±0.06                 | 12.93±0.04                 | 39.82±0.48                          | 8.30±0.05                 | 4.32±0.07                | 31.05±0.03                 | 12.07±0.04                 |
| BhimaSafed                   | 38.60±0.37          | 8.56±0.06                 | 5.15±0.04                | 43.10±0.06                 | 12.17±0.10                 | 34.72±0.51                          | 8.22±0.11                 | 4.35±0.03                | 27.90±0.06                 | 11.43±0.08                 |
| JRO 11 (GJRO 11)             | 46.55±0.38          | 8.65±0.06                 | 5.33±0.05                | 53.25±0.14                 | 13.50±0.29                 | 43.20±0.52                          | 8.40±0.09                 | 4.78±0.04                | 35.72±0.03                 | 12.57±0.02                 |
| Bhima Light Red              | 34.98±0.09          | 7.42±0.10                 | 5.93±0.04                | 68.61±0.06                 | 12.17±0.10                 | 33.48±0.27                          | 7.21±0.08                 | 5.30±0.07                | 46.55±0.06                 | 11.77±0.12                 |
| HOS 4 (Hisar onion 4)        | 41.62±0.23          | 9.06±0.02                 | 5.81±0.02                | 56.16±0.09                 | 14.03±0.02                 | 38.62±0.28                          | 8.62±0.07                 | 5.33±0.17                | 39.63±0.07                 | 13.03±0.02                 |
| GJWO 3                       | 41.93±0.34          | 7.99±0.03                 | 5.38±0.03                | 49.30±0.17                 | 12.50±0.06                 | 37.65±0.45                          | 7.87±0.12                 | 4.43±0.08                | 28.28±0.16                 | 11.00±0.09                 |
| NHRDF Red-4 (L-744)          | 45.43±0.33          | 8.85±0.03                 | 5.92±0.06                | 74.38±0.69                 | 12.17±0.10                 | 44.03±0.36                          | 8.71±0.06                 | 5.29±0.05                | 60.40±0.23                 | 11.63±0.12                 |
| Pusa Shobha                  | 41.77±0.25          | 7.40±0.12                 | 5.37±0.04                | 64.38±0.47                 | 16.80±0.03                 | 39.90±0.18                          | 7.25±0.06                 | 5.35±0.05                | 44.12±0.07                 | 13.80±0.06                 |
| Pusa Sona                    | 39.48±0.33          | 7.66±0.05                 | 5.68±0.09                | 60.20±0.53                 | 12.90±0.06                 | 37.90±0.34                          | 7.60±0.03                 | 4.72±0.05                | 37.06±0.03                 | 12.17±0.10                 |

|               |            |           |           |            |            |            |           |           |            |            |
|---------------|------------|-----------|-----------|------------|------------|------------|-----------|-----------|------------|------------|
| POS35         | 43.22±0.18 | 8.30±0.02 | 6.18±0.02 | 77.48±0.34 | 12.43±0.02 | 42.20±0.25 | 8.27±0.14 | 5.62±0.07 | 65.95±0.03 | 12.00±0.03 |
| POS36         | 43.25±0.45 | 8.35±0.06 | 5.87±0.08 | 66.95±0.12 | 13.37±0.06 | 42.26±0.32 | 8.15±0.08 | 5.02±0.05 | 55.44±0.25 | 12.30±0.17 |
| POS39         | 41.30±0.26 | 8.79±0.05 | 5.81±0.05 | 52.65±0.20 | 15.20±0.12 | 38.33±0.16 | 7.90±0.06 | 4.58±0.03 | 41.83±0.07 | 13.37±0.05 |
| POS37         | 43.20±0.23 | 8.70±0.09 | 5.69±0.30 | 70.65±0.09 | 12.77±0.06 | 42.55±0.26 | 8.48±0.17 | 5.54±0.04 | 56.89±0.06 | 12.07±0.04 |
| Sukhsagar     | 40.73±0.44 | 8.12±0.05 | 5.05±0.03 | 51.26±0.15 | 14.50±0.06 | 35.47±0.19 | 7.60±0.12 | 4.04±0.02 | 31.67±0.19 | 11.60±0.12 |
| PRO 6         | 39.60±0.41 | 7.66±0.09 | 5.67±0.08 | 59.79±0.12 | 15.53±0.06 | 38.13±0.20 | 7.60±0.07 | 4.90±0.07 | 39.10±0.06 | 12.57±0.02 |
| JNDWO-85      | 43.27±0.26 | 8.44±0.04 | 5.02±0.04 | 53.10±0.06 | 12.33±0.19 | 40.00±0.60 | 8.36±0.21 | 4.56±0.06 | 38.95±0.03 | 11.17±0.10 |
| NHRDF (L-920) | 46.42±0.32 | 8.08±0.05 | 4.72±0.03 | 41.56±0.12 | 16.10±0.03 | 43.67±0.52 | 8.06±0.03 | 3.50±0.03 | 21.36±0.21 | 14.30±0.17 |

**Table S2.**Na<sup>+</sup>/K<sup>+</sup> ratios of selected onion accessions under control and salinity stress

| Cultivars name | Root Na <sup>+</sup> /K <sup>+</sup> |                          | Shoot Na <sup>+</sup> /K <sup>+</sup> |                        | Bulb Na <sup>+</sup> /K <sup>+</sup> |                          |
|----------------|--------------------------------------|--------------------------|---------------------------------------|------------------------|--------------------------------------|--------------------------|
|                | Control                              | Salinity                 | Control                               | Salinity               | Control                              | Salinity                 |
| POS35          | 1.29±0.07 <sup>f</sup>               | 3.25±0.25 <sup>cde</sup> | 1.13±0.03 <sup>de</sup>               | 2.35±0.03 <sup>g</sup> | 0.21±0.02 <sup>cd</sup>              | 0.30±0.02 <sup>de</sup>  |
| L-28           | 1.57±0.06 <sup>de</sup>              | 3.29±0.09 <sup>bcd</sup> | 0.89±0.04 <sup>f</sup>                | 1.65±0.04 <sup>i</sup> | 0.25±0.01 <sup>ab</sup>              | 0.31±0.02 <sup>de</sup>  |
| GJWO 1         | 1.15±0.07 <sup>fg</sup>              | 3.10±0.08 <sup>e</sup>   | 1.05±0.03 <sup>e</sup>                | 2.42±0.10 <sup>g</sup> | 0.26±0.03 <sup>a</sup>               | 0.41±0.02 <sup>a</sup>   |
| POS36          | 1.55±0.05 <sup>e</sup>               | 3.10±0.04 <sup>e</sup>   | 1.67±0.05 <sup>a</sup>                | 2.36±0.04 <sup>g</sup> | 0.23±0.02 <sup>abc</sup>             | 0.26±0.01 <sup>f</sup>   |
| POS37          | 1.30±0.04 <sup>f</sup>               | 3.31±0.07 <sup>bcd</sup> | 1.06±0.06 <sup>e</sup>                | 1.44±0.10 <sup>j</sup> | 0.23±0.01 <sup>abc</sup>             | 0.36±0.03 <sup>b</sup>   |
| L-744          | 1.28±0.05 <sup>f</sup>               | 3.20±0.05 <sup>cde</sup> | 0.95±0.05 <sup>f</sup>                | 1.92±0.08 <sup>h</sup> | 0.25±0.02 <sup>ab</sup>              | 0.29±0.02 <sup>def</sup> |
| POS38          | 2.16±0.11 <sup>b</sup>               | 3.32±0.10 <sup>bcd</sup> | 1.46±0.10 <sup>b</sup>                | 2.64±0.04 <sup>f</sup> | 0.23±0.01 <sup>abc</sup>             | 0.28±0.02 <sup>ef</sup>  |
| ALR            | 2.07±0.07 <sup>b</sup>               | 3.46±0.16 <sup>b</sup>   | 1.37±0.07 <sup>c</sup>                | 3.88±0.08 <sup>a</sup> | 0.26±0.01 <sup>a</sup>               | 0.31±0.01 <sup>de</sup>  |
| GJWO 3         | 1.71±0.10 <sup>cde</sup>             | 3.38±0.08 <sup>bc</sup>  | 1.45±0.03 <sup>bc</sup>               | 3.78±0.06 <sup>b</sup> | 0.25±0.01 <sup>ab</sup>              | 0.32±0.03 <sup>cd</sup>  |
| KRR            | 2.48±0.18 <sup>a</sup>               | 3.79±0.11 <sup>a</sup>   | 1.13±0.05 <sup>de</sup>               | 3.79±0.04 <sup>b</sup> | 0.22±0.02 <sup>bcd</sup>             | 0.38±0.04 <sup>ab</sup>  |
| L-652          | 1.76±0.04 <sup>c</sup>               | 3.76±0.11 <sup>a</sup>   | 1.59±0.03 <sup>a</sup>                | 3.63±0.15 <sup>c</sup> | 0.24±0.01 <sup>abc</sup>             | 0.36±0.03 <sup>b</sup>   |

|                 |                         |                          |                                    |                        |                          |                         |
|-----------------|-------------------------|--------------------------|------------------------------------|------------------------|--------------------------|-------------------------|
| Agrifound White | 1.73±0.05 <sup>cd</sup> | 3.66±0.06 <sup>a</sup>   | 1.13±0.05 <sup>d<sup>e</sup></sup> | 3.66±0.05 <sup>c</sup> | 0.19±0.02 <sup>d</sup>   | 0.30±0.01 <sup>de</sup> |
| L-920           | 1.05±0.05 <sup>g</sup>  | 3.29±0.09 <sup>bcd</sup> | 0.71±0.02 <sup>g</sup>             | 2.76±0.06 <sup>e</sup> | 0.24±0.01 <sup>abc</sup> | 0.35±0.03 <sup>bc</sup> |
| Bhima Dark Red  | 2.13±0.03 <sup>b</sup>  | 3.14±0.14 <sup>de</sup>  | 1.21±0.03 <sup>d</sup>             | 3.47±0.07 <sup>d</sup> | 0.19±0.01 <sup>d</sup>   | 0.37±0.01 <sup>b</sup>  |

Numerical Values are represented as Mean ± SD, means comparison was performed through, Duncan's Multiple Range Test (DMRT), Values with the same letter as super script are not significantly different.

**Table S3.** Regression coefficient, standard error, and significance of the prioritized traits entered into the predicted response for salinity stress tolerance

| Variables in equation                | Regression coefficients (βs) | Standard Error(SE) | t -Value | Pr(> t ) | F-to-Remove |
|--------------------------------------|------------------------------|--------------------|----------|----------|-------------|
| Constant                             | -409.75                      |                    |          |          |             |
| BD                                   | 21.38                        | 1.91               | 11.18    | 0.000    | 125.06      |
| PH                                   | 2.28                         | 0.20               | 11.10    | 0.000    | 123.25      |
| APX                                  | 0.52                         | 0.06               | 8.24     | 0.000    | 67.85       |
| gS                                   | -137.77                      | 39.75              | -3.47    | 0.002    | 12.01       |
| POX                                  | 1.21                         | 0.23               | 5.21     | 0.000    | 27.17       |
| CAT                                  | -1.47                        | 0.52               | -2.85    | 0.008    | 8.14        |
| MDA                                  | 3.21                         | 0.72               | 4.45     | 0.000    | 19.82       |
| MSI                                  | 1.44                         | 0.42               | 3.44     | 0.001    | 11.81       |
| Bulb Na <sup>+</sup> /K <sup>+</sup> | 33.57                        | 14.29              | 2.35     | 0.025    | 5.52        |

**Predicted bulb yield = -409.75+ (21.38 × BD) + (2.28 × PH) + (0.52× APX) + (-137.77× gS) +(1.21 × POX) + (-1.47 × CAT) + (3.21 × MDA) + (1.44 × MSI) + (Bulb Na<sup>+</sup> /K<sup>+</sup>)**

#BD-Bulb diameter, PH-Plant height, APX-Ascorbate peroxidase, gS-Stomatal conductance, POX-Peroxidase, CAT-Catalase, MDA-Malondialdehyde, MSI-Membrane Stability Index, Bulb Na<sup>+</sup> /K<sup>+</sup>
